# Supplementary material for: Mining phenotypes for gene function prediction
Source: PubMed Central journal article supplement (PMC2311305; doi:10.1186/1471-2105-9-136), 2008-03-03
Supplement: 1471-2105-9-136-S1.pdf [file 1471-2105-9-136-S1.pdf]

## Listing of and evidence for phenocopies

| Number | GeneIDs                    | PubMedIDs                              |
|--------|----------------------------|----------------------------------------|
| 1      | 38879, 36538               | 16129829                               |
| 2      | 42445, 31293               | 12049762                               |
| 3      | 15460, 22337               | 11564167                               |
| 4      | 16835, 100017              | 15728179, 17200716, 14717060, 16343504 |
| 5      | 18516, 27140               | 15466398                               |
| 6      | 36775, 43916               | 11877391                               |
| 7      | 41885, 39844               | 17353360                               |
| 8      | 11491, 13649               | 16079154                               |
| 9      | 19378, 15426               | 15753214                               |
| 10     | 44279, 34009               | 11029007                               |
| 11     | 35197, 41363               | 16774999                               |
| 12     | 3346167, 31816             | 16862128                               |
| 13     | 12802, 14678               | 16924491                               |
| 14     | 856580, 850675             | 17553781                               |
| 15     | 13433, 20937               | 16980612                               |
| 16     | 13711, 19116               | 15650748                               |
| 17     | 14179, 14182               | 15221377                               |
| 18     | 14460, 14461, 22761        | 12077323                               |
| 19     | 15111, 22160               | 16237669                               |
| 20     | 17319, 15251               | 17142669                               |
| 21     | 16449, 18129               | 12496659, 15509774                     |
| 22     | 4000, 10269                | 16079796                               |
| 23     | 17283, 214162              | 15199122                               |
| 24     | 19164, 19165, 18128, 18129 | 12424225, 15525534                     |
| 25     | 17125, 55994               | 15899870                               |
| 26     | 14950, 74585               | 15998642                               |
| 27     | 69581, 22408               | 11459829                               |
