# Supplementary material for: Mining phenotypes for gene function prediction
Source: PubMed Central journal article supplement (PMC2311305; doi:10.1186/1471-2105-9-136), 2008-03-03
Supplement: 1471-2105-9-136-S2.pdf [file 1471-2105-9-136-S2.pdf]

Figures on phenotypes and phenodocs

Number of phenotypes/phenodocs: 39,610

Phenotypes:

Words:

Avg: 169.99

Min: 27

Max: 985

Characters (excluding whitespaces):

Avg: 1135.29

Min: 251

Max: 6528

Number of unique words: 113283

Phenodocs:

Features:

Avg: 67.87

Min: 12

Max: 364

Number of unique features: 73188
